# Supplementary material for: The ideal duo for salt formation: vinpocetine and tosylic acid
Source: Royal Society of Chemistry journal article supplement (doi:10.1039/d5pm00225g), 2025-10-20
Supplement: d5pm00225g1.pdf [file d5pm00225g1.pdf]

## SUPPLEMENTARY INFORMATION

### The Ideal Duo for Salt Formation: Vinpocetine and Tosylic Acid

*Ilenia D'Abbrunzo, Francesca Beltrame, Lara Gigli, Nicola Demitri, Cinzia Cepek, Giuseppe Procida, Dario Voinovich, Beatrice Perissutti*

#### Contents

| Description                                                                                                                                                                                                                  | Page N°  |
|------------------------------------------------------------------------------------------------------------------------------------------------------------------------------------------------------------------------------|----------|
| <b>Table S1.</b> Fit XPS (N 1s).                                                                                                                                                                                             | <b>3</b> |
| <b>Table S2.</b> Fit XPS (C 1s).                                                                                                                                                                                             | <b>4</b> |
| <b>Table S3.</b> Fit XPS (O 1s).                                                                                                                                                                                             | <b>5</b> |
| <b>Figure S1.</b> Visual appearance of VINPO-PTOS salt powders ground (2h) in the presence of EA (A), ACT (B), ACN (C), MeOH (D), EtOH (E), and H <sub>2</sub> O (F).                                                        | <b>6</b> |
| <b>Figure S2.</b> PXRD pattern of the VINPO-PTOS salt obtained using LAG (2h) employing different solvents (from top to bottom: HXN, 4-MTHP, EA, ACT, EtOH, MeOH, ACN and H <sub>2</sub> O), compared with VINPO and PTOSMH. | <b>6</b> |
| <b>Table S4.</b> Crystallographic data and refinement details for VINPO-PTOS salt at 298 K and 100 K.                                                                                                                        | <b>7</b> |
| <b>Figure S3.</b> Comparison of the C 1s XPS spectra for pure VINPO (c), the VINPO-PTOS amorphous system (b), and the crystalline (a) VINPO-PTOS salt.                                                                       | <b>8</b> |
| <b>Figure S4.</b> Comparison of the O 1s XPS spectra for pure VINPO (c), the VINPO-PTOS amorphous system (b), and the crystalline (a) VINPO-PTOS salt.                                                                       | <b>8</b> |
| <b>Figure S5.</b> HPLC chromatogram of pure VINPO (yellow), crystalline VINPO-PTOS salt obtained by WAG process (blue) and amorphous VINPO-PTOS salt obtained by NG process (green).                                         | <b>9</b> |
| <b>Figure S6.</b> TGA (black) and DSC (red) curves of crystalline VINPO-PTOS salt.                                                                                                                                           | <b>9</b> |

|                                                                                                                                                                                                                                                                                                                                  |           |
|----------------------------------------------------------------------------------------------------------------------------------------------------------------------------------------------------------------------------------------------------------------------------------------------------------------------------------|-----------|
| <b>Figure S7.</b> TGA (black) and DSC (red) curves of amorphous VINPO-PTOS salt.                                                                                                                                                                                                                                                 | <b>10</b> |
| <b>Figure S8.</b> Glass transition temperature ( $T_g$ ) for the amorphous VINPO-PTOS salt detected in the second heating run (heating/cooling/heating cycle).                                                                                                                                                                   | <b>10</b> |
| <b>Figure S9.</b> Glass transition temperature ( $T_g$ ) for PTOS MH, detected in the second heating run (heating/cooling/heating cycle).                                                                                                                                                                                        | <b>11</b> |
| <b>Figure S10.</b> FT-IR ATR spectra of VINPO-PTOS crystalline (green) and amorphous (pink) salts, compared to VINPO (blue) and PTOS MH (red). Differences between the two salts spectra are highlighted through light grey rectangles; differences with the starting materials are highlighted through light orange rectangles. | <b>12</b> |
| <b>Figure S11.</b> PXRD of the white solid collected after solubility studies of (initially) amorphous VINPO-PTOS salt                                                                                                                                                                                                           | <b>12</b> |
| <b>Figure S12.</b> Physical stability of VINPO-PTOS crystalline salt over time.                                                                                                                                                                                                                                                  | <b>13</b> |
| <b>Figure S13.</b> Physical stability of VINPO-PTOS amorphous salt over time.                                                                                                                                                                                                                                                    | <b>13</b> |
| <b>Figure S14.</b> Appearance of VINPO-PTOS amorphous salt (yellow) and crystalline salt (white) after 2 hours of storage at 75% RH and 20 °C.                                                                                                                                                                                   | <b>14</b> |
| <b>Figure S15.</b> PXRD of VINPO-PTOS amorphous salt after 2h of exposure to 75% RH.                                                                                                                                                                                                                                             | <b>14</b> |

**Table S1.** Fit XPS (N 1s).

| VINPOCETINE             |                            |                           |
|-------------------------|----------------------------|---------------------------|
| Plot                    | N1                         | N11                       |
| <b>xc</b>               | <b>400.27946 ± 0.01191</b> | <b>398.8759 ± 0.01158</b> |
| A                       | 269.13418 ± 3.61111        | 279.49335 ± 3.6424        |
| <b>Gaussian width</b>   | <b>1.30919 ± 0.02013</b>   | <b>1.30919 ± 0.02013</b>  |
| <b>Lorentzian width</b> | <b>0.4</b>                 | <b>0.4</b>                |
| Reduced Chi-Sqr         | 22.79216                   |                           |
| R-Square (COD)          | 0.99434                    |                           |
| Adj. R-Square           | 0.99415                    |                           |

| AMORPHOUS SALT          |                            |                           |
|-------------------------|----------------------------|---------------------------|
| Plot                    | N11                        | N1                        |
| <b>xc</b>               | <b>401.70115 ± 0.05238</b> | <b>400.55795 ± 0.0503</b> |
| A                       | 128.35432 ± 9.87456        | 177.63961 ± 10.74091      |
| <b>Gaussian width</b>   | <b>1.70532 ± 0.0783</b>    | <b>1.70532 ± 0.0783</b>   |
| <b>Lorentzian width</b> | <b>0.4</b>                 | <b>0.4</b>                |
| Reduced Chi-Sqr         | 14.92283                   |                           |
| R-Square (COD)          | 0.98808                    |                           |
| Adj. R-Square           | 0.98767                    |                           |

| CRYSTALLINE SALT        |                            |                            |
|-------------------------|----------------------------|----------------------------|
| Plot                    | N11                        | N1                         |
| <b>xc</b>               | <b>402.03821 ± 0.05303</b> | <b>400.85734 ± 0.04688</b> |
| A                       | 107.23586 ± 7.38943        | 141.4912 ± 8.09619         |
| <b>Gaussian width</b>   | <b>1.54173 ± 0.08095</b>   | <b>1.54173 ± 0.08095</b>   |
| <b>Lorentzian width</b> | <b>0.4</b>                 | <b>0.4</b>                 |
| Reduced Chi-Sqr         | 20.45256                   |                            |
| R-Square (COD)          | 0.97658                    |                            |
| Adj. R-Square           | 0.97579                    |                            |

**Table S2.** Fit XPS (C 1s).

| VINPOCETINE      |                        |                       |                      |
|------------------|------------------------|-----------------------|----------------------|
| Plot             | C-C, C-H               | C-O                   | C=O                  |
| xc               | 284.5655 ± 0.03547     | 285.90562 ± 0.17988   | 288.78154 ± 0.12386  |
| A                | 4590.97256 ± 208.33977 | 714.36348 ± 190.95346 | 378.42857 ± 38.29967 |
| Gaussian width   | 1.67204 ± 0.05465      | 1.67204 ± 0.05465     | 1.67204 ± 0.05465    |
| Lorentzian width | 0.4                    | 0.4                   | 0.4                  |
| Reduced Chi-Sqr  | 4555.53302             |                       |                      |
| R-Square (COD)   | 0.98502                |                       |                      |
| Adj. R-Square    | 0.98457                |                       |                      |

| AMORPHOUS SALT   |                        |                     |                      |
|------------------|------------------------|---------------------|----------------------|
| Plot             | C-C, C-H               | C-O                 | C=O                  |
| xc               | 284.55123 ± 0.02536    | 285.92161 ± 0.09286 | 288.75883 ± 0.13883  |
| A                | 3139.16926 ± 100.79657 | 735.0305 ± 89.13488 | 225.10624 ± 27.69878 |
| Gaussian width   | 1.54659 ± 0.04539      | 1.54659 ± 0.04539   | 1.54659 ± 0.04539    |
| Lorentzian width | 0.4                    | 0.4                 | 0.4                  |
| Reduced Chi-Sqr  | 2562.94988             |                     |                      |
| R-Square (COD)   | 0.98413                |                     |                      |
| Adj. R-Square    | 0.98366                |                     |                      |

| CRYSTALLINE SALT |                       |                       |                      |
|------------------|-----------------------|-----------------------|----------------------|
| Plot             | C-C, C-H              | C-O                   | C=O                  |
| xc               | 284.53371 ± 0.01583   | 285.93568 ± 0.0629    | 288.35581 ± 0.06482  |
| A                | 4623.98259 ± 94.13718 | 1114.05939 ± 80.56504 | 594.80046 ± 36.34205 |
| Gaussian width   | 1.41476 ± 0.03146     | 1.41476 ± 0.03146     | 1.41476 ± 0.03146    |
| Lorentzian width | 0.4                   | 0.4                   | 0.4                  |
| Reduced Chi-Sqr  | 4592.68019            |                       |                      |
| R-Square (COD)   | 0.98761               |                       |                      |
| Adj. R-Square    | 0.98724               |                       |                      |

**Table S3.** Fit XPS (O 1s).

| VINPOCETINE      |                            |                            |                            |
|------------------|----------------------------|----------------------------|----------------------------|
| Plot             | OH                         | Carbonates                 | C-O/C=O                    |
| xc               | <b>533.57348 ± 0.02709</b> | <b>532.12887 ± 0.02002</b> | <b>530.14179 ± 0.13252</b> |
| A                | 1029.63891 ± 29.07399      | 1725.84747 ± 32.21376      | 171.41075 ± 19.38785       |
| Gaussian width   | <b>1.52416 ± 0.04032</b>   | <b>1.52416 ± 0.04032</b>   | <b>1.52416 ± 0.04032</b>   |
| Lorentzian width | <b>0.5</b>                 | <b>0.5</b>                 | <b>0.5</b>                 |
| Reduced Chi-Sqr  | 594.35296                  |                            |                            |
| R-Square (COD)   | 0.99226                    |                            |                            |
| Adj. R-Square    | 0.99198                    |                            |                            |

| AMORPHOUS SALT   |                        |                            |                            |
|------------------|------------------------|----------------------------|----------------------------|
| Plot             | C-O/C=O                | OH                         | Carbonates                 |
| xc               | <b>530.5 ± 0.33176</b> | <b>533.68024 ± 0.08042</b> | <b>532.15577 ± 0.07303</b> |
| A                | 235.71401 ± 93.88112   | 938.68325 ± 77.68822       | 1810.75247 ± 92.6359       |
| Gaussian width   | <b>1.8 ± 0.12711</b>   | <b>1.8 ± 0.12711</b>       | <b>1.8 ± 0.12711</b>       |
| Lorentzian width | <b>0.5</b>             | <b>0.5</b>                 | <b>0.5</b>                 |
| Reduced Chi-Sqr  | 1550.11489             |                            |                            |
| R-Square (COD)   | 0.97804                |                            |                            |
| Adj. R-Square    | 0.97726                |                            |                            |

| CRYSTALLINE SALT |                            |                            |                            |
|------------------|----------------------------|----------------------------|----------------------------|
| Plot             | C-O/C=O                    | Carbonates                 | OH                         |
| xc               | <b>530.74585 ± 0.19176</b> | <b>532.20279 ± 0.05605</b> | <b>533.64848 ± 0.05048</b> |
| A                | 480.66249 ± 117.23869      | 2684.00477 ± 101.61352     | 1659.72994 ± 90.34634      |
| Gaussian width   | <b>1.53041 ± 0.08549</b>   | <b>1.53041 ± 0.08549</b>   | <b>1.53041 ± 0.08549</b>   |
| Lorentzian width | <b>0.5</b>                 | <b>0.5</b>                 | <b>0.5</b>                 |
| Reduced Chi-Sqr  | 3859.76878                 |                            |                            |
| R-Square (COD)   | 0.97829                    |                            |                            |
| Adj. R-Square    | 0.97764                    |                            |                            |

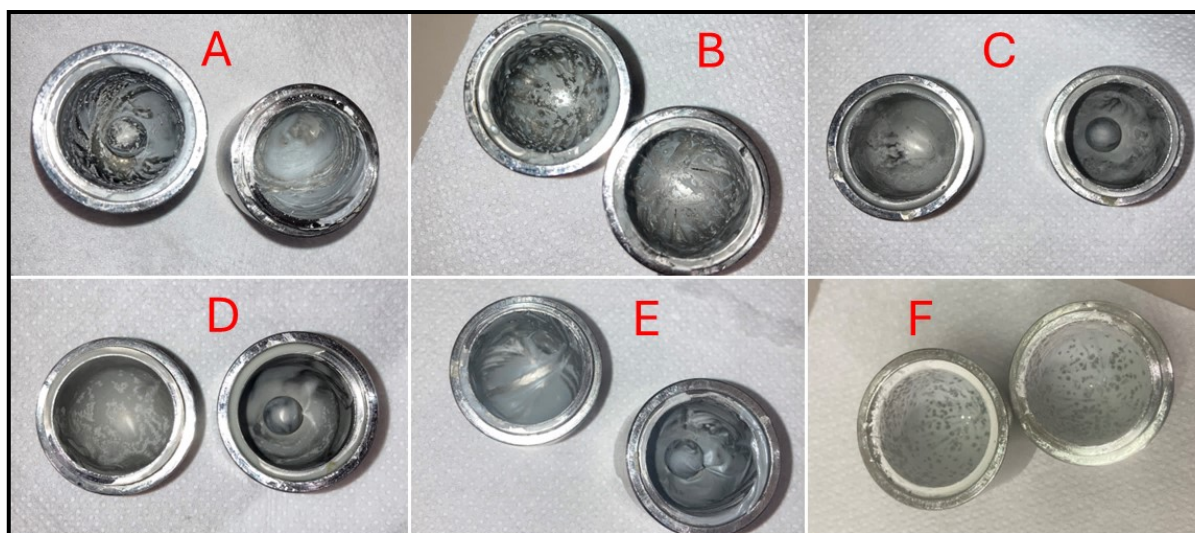

**Figure S1.** Visual appearance of VINPO-PTOS salt powders ground (2h) in the presence of EA (A), ACT (B), ACN (C), MeOH (D), EtOH (E), and H<sub>2</sub>O (F).

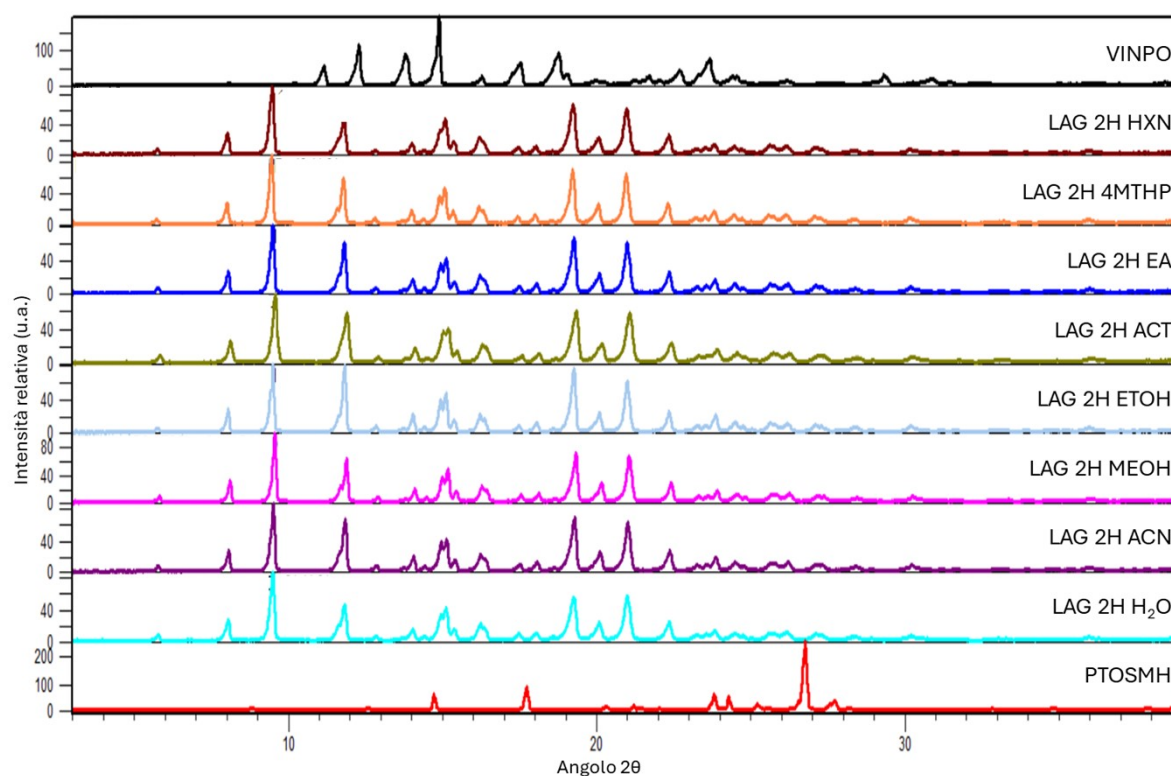

**Figure S2.** PXRD pattern of the VINPO-PTOS salt obtained using LAG (2h) employing different solvents (from top to bottom: HXN, 4-MTHP, EA, ACT, EtOH, MeOH, ACN and H<sub>2</sub>O), compared with VINPO and PTOSMH.

**Table S4.** Crystallographic data and refinement details for VINPO-PTOS salt at 298 K and 100 K.

|                                                                  | VINPO-PTOS (298 K)                                                                                               | VINPO-PTOS (100 K)                                                                                               |
|------------------------------------------------------------------|------------------------------------------------------------------------------------------------------------------|------------------------------------------------------------------------------------------------------------------|
| Chemical Formula                                                 | [C <sub>22</sub> H <sub>27</sub> N <sub>2</sub> O <sub>2</sub> ](C <sub>7</sub> H <sub>7</sub> SO <sub>3</sub> ) | [C <sub>22</sub> H <sub>27</sub> N <sub>2</sub> O <sub>2</sub> ](C <sub>7</sub> H <sub>7</sub> SO <sub>3</sub> ) |
| Formula weight                                                   | 522.64 g/mol                                                                                                     | 522.64 g/mol                                                                                                     |
| Temperature                                                      | 298(2) K                                                                                                         | 100(2) K                                                                                                         |
| Wavelength                                                       | 0.620 Å                                                                                                          | 0.620 Å                                                                                                          |
| Crystal system                                                   | Orthorhombic                                                                                                     | Orthorhombic                                                                                                     |
| Space Group                                                      | <i>P</i> 2 <sub>1</sub> 2 <sub>1</sub> 2 <sub>1</sub>                                                            | <i>P</i> 2 <sub>1</sub> 2 <sub>1</sub> 2 <sub>1</sub>                                                            |
| Unit cell dimensions                                             | <i>a</i> = 7.644(2) Å                                                                                            | <i>a</i> = 7.657(2) Å                                                                                            |
|                                                                  | <i>b</i> = 11.612(2) Å                                                                                           | <i>b</i> = 11.515(2) Å                                                                                           |
|                                                                  | <i>c</i> = 30.133(6) Å                                                                                           | <i>c</i> = 29.672(6) Å                                                                                           |
|                                                                  | $\alpha$ = 90°                                                                                                   | $\alpha$ = 90°                                                                                                   |
|                                                                  | $\beta$ = 90°                                                                                                    | $\beta$ = 90°                                                                                                    |
|                                                                  | $\gamma$ = 90°                                                                                                   | $\gamma$ = 90°                                                                                                   |
|                                                                  |                                                                                                                  |                                                                                                                  |
| Volume                                                           | 2674.7(9) Å <sup>3</sup>                                                                                         | 2616.2(9) Å <sup>3</sup>                                                                                         |
| Z                                                                | 4                                                                                                                | 4                                                                                                                |
| Density (calculated)                                             | 1.298 g·cm <sup>-3</sup>                                                                                         | 1.327 g·cm <sup>-3</sup>                                                                                         |
| Absorption coefficient                                           | 0.115 mm <sup>-1</sup>                                                                                           | 0.118 mm <sup>-1</sup>                                                                                           |
| F(000)                                                           | 1112                                                                                                             | 1112                                                                                                             |
| Theta range for data collection                                  | 1.2° to 31.2°                                                                                                    | 1.2° to 31.2°                                                                                                    |
| Index ranges                                                     | -11 ≤ <i>h</i> ≤ 11,                                                                                             | -12 ≤ <i>h</i> ≤ 12,                                                                                             |
|                                                                  | -19 ≤ <i>k</i> ≤ 19,                                                                                             | -19 ≤ <i>k</i> ≤ 19,                                                                                             |
|                                                                  | -50 ≤ <i>l</i> ≤ 50                                                                                              | -49 ≤ <i>l</i> ≤ 49                                                                                              |
| Reflections collected                                            | 62797                                                                                                            | 62713                                                                                                            |
| Independent reflections<br>(data with <i>I</i> > 2σ( <i>I</i> )) | 11945 (11334)                                                                                                    | 11926 (11584)                                                                                                    |
| Resolution                                                       | 0.60 Å                                                                                                           | 0.60 Å                                                                                                           |
| Data multiplicity (max resltn)                                   | 8.38 (5.23)                                                                                                      | 8.86 (5.21)                                                                                                      |
| <i>I</i> /σ( <i>I</i> ) (max resltn)                             | 34.14 (13.92)                                                                                                    | 30.26 (16.99)                                                                                                    |
| Rmerge (max resltn)                                              | 0.0464 (0.1175)                                                                                                  | 0.0526 (0.0818)                                                                                                  |
| Data completeness (max resltn)                                   | 92.8% (80.6%)                                                                                                    | 94.8% (85.6%)                                                                                                    |
| Refinement method                                                | Full-matrix LS on <i>F</i> <sup>2</sup>                                                                          | Full-matrix LS on <i>F</i> <sup>2</sup>                                                                          |
| Data/restraints/parameters                                       | 11945 / 0 / 338                                                                                                  | 11926 / 0 / 338                                                                                                  |
| Goodness-of-fit on <i>F</i> <sup>2</sup>                         | 1.027                                                                                                            | 1.032                                                                                                            |
| Δ/σ <sub>max</sub>                                               | 0.000                                                                                                            | 0.002                                                                                                            |
| Final R indices [ <i>I</i> > 2σ( <i>I</i> )]                     | <i>R</i> <sub>1</sub> = 0.0550                                                                                   | <i>R</i> <sub>1</sub> = 0.0337                                                                                   |
|                                                                  | <i>wR</i> <sub>2</sub> = 0.1524                                                                                  | <i>wR</i> <sub>2</sub> = 0.0928                                                                                  |

|                            |                                            |                                            |
|----------------------------|--------------------------------------------|--------------------------------------------|
| R indices (all data)       | $R_1 = 0.0570$<br>$wR_2 = 0.1566$          | $R_1 = 0.0346$<br>$wR_2 = 0.0939$          |
| Flack x parameter          | 0.02(1)                                    | -0.02(2)                                   |
| Largest diff peak and hole | 0.736 and -0.505 $\text{e}\text{\AA}^{-3}$ | 0.428 and -0.316 $\text{e}\text{\AA}^{-3}$ |
| R.M.S. deviation from mean | 0.103 $\text{e}\text{\AA}^{-3}$            | 0.061 $\text{e}\text{\AA}^{-3}$            |

$$R_1 = \Sigma ||F_o| - |F_c|| / \Sigma |F_o|, wR_2 = \{ \Sigma [w(F_o^2 - F_c^2)^2] / \Sigma [w(F_o^2)^2] \}^{1/2}$$

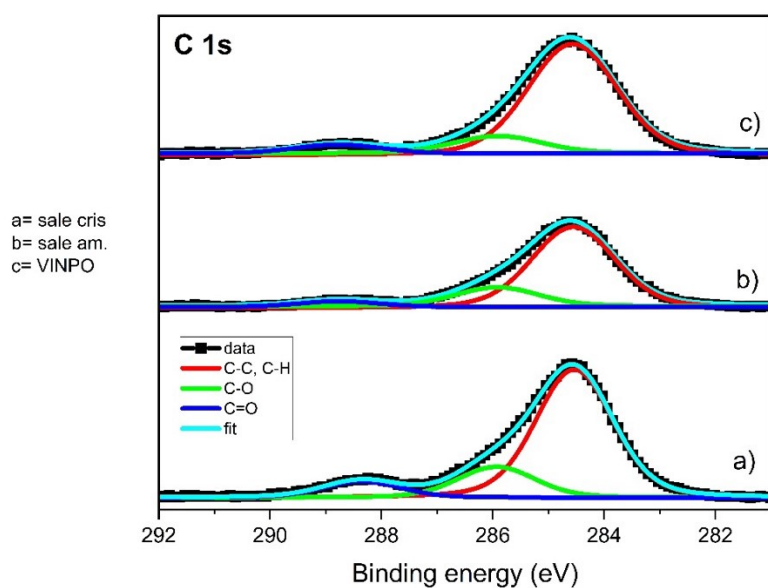

**Figure S3.** Comparison of the C 1s XPS spectra for pure VINPO (c), the VINPO-PTOS amorphous system (b), and the crystalline (a) VINPO-PTOS salt.

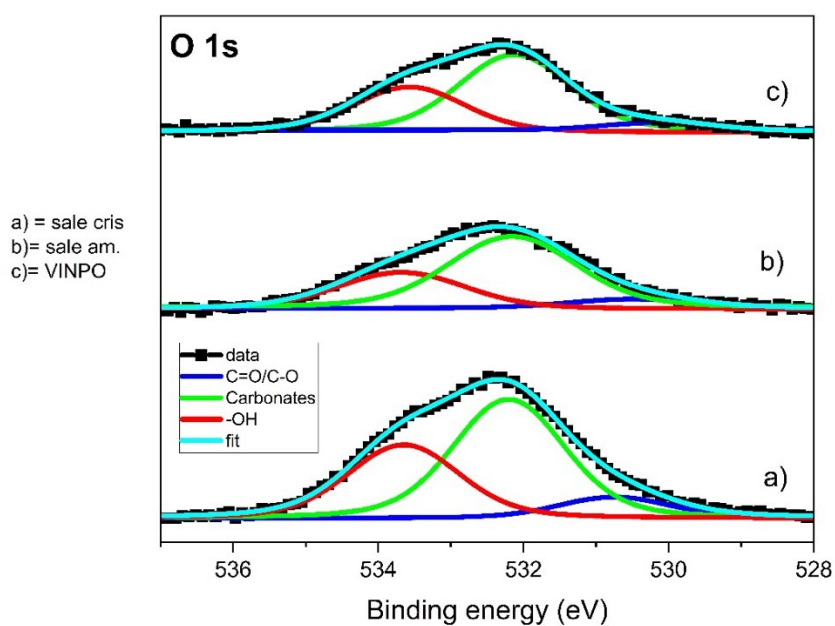



**Figure S4.** Comparison of the O 1s XPS spectra for pure VINPO (c), the VINPO-PTOS amorphous system (b), and the crystalline (a) VINPO-PTOS salt.

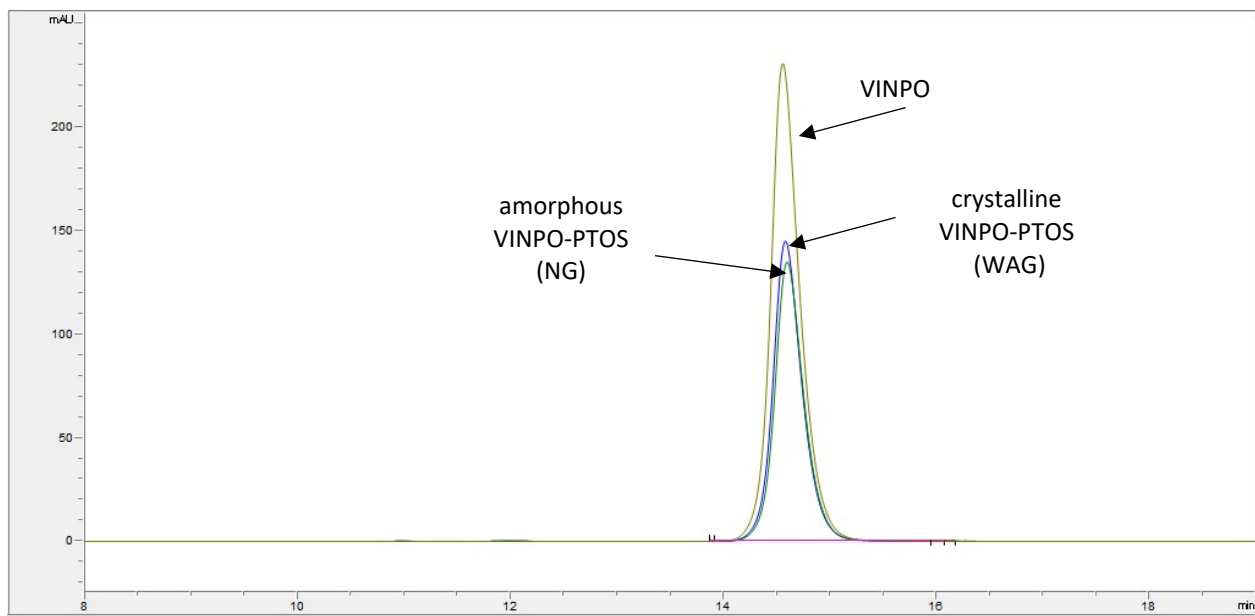

**Figure S5.** HPLC chromatogram of pure VINPO (yellow), crystalline VINPO-PTOS salt obtained by WAG process (blue) and amorphous VINPO-PTOS salt obtained by NG process (green).

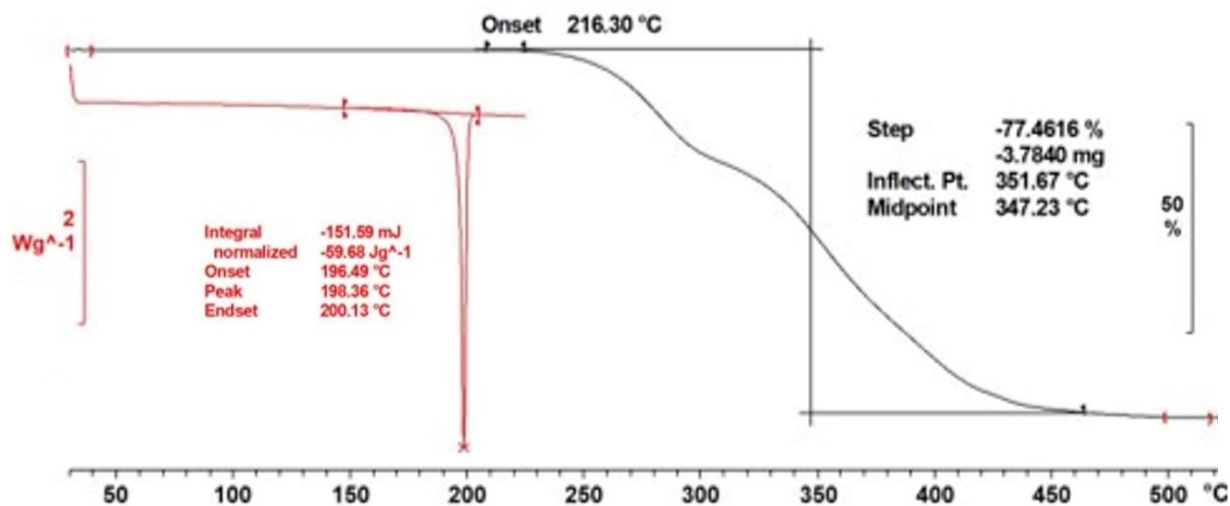

**Figure S6.** TGA (black) and DSC (red) curves of crystalline VINPO-PTOS salt.

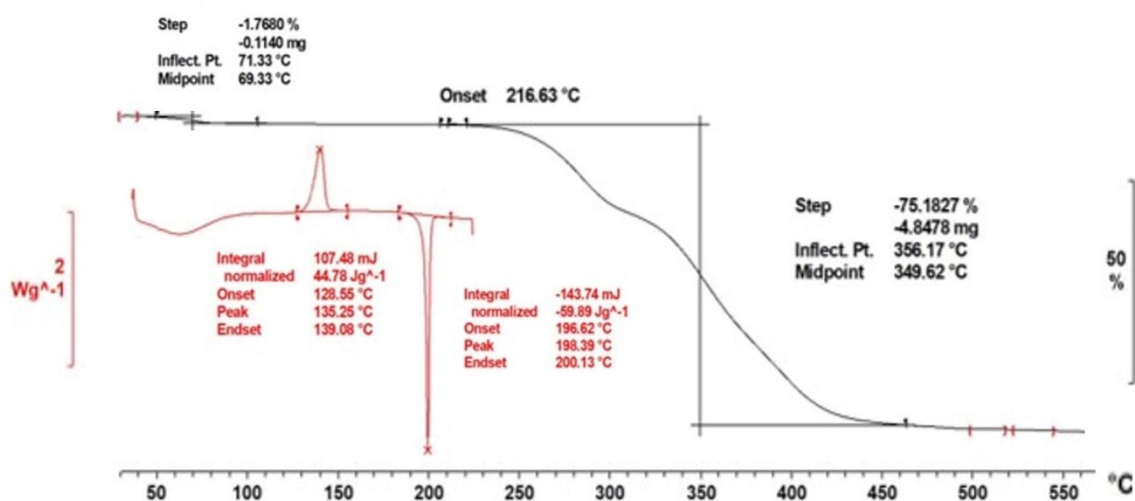

**Figure S7.** TGA (black) and DSC (red) curves of amorphous VINPO-PTOS salt.

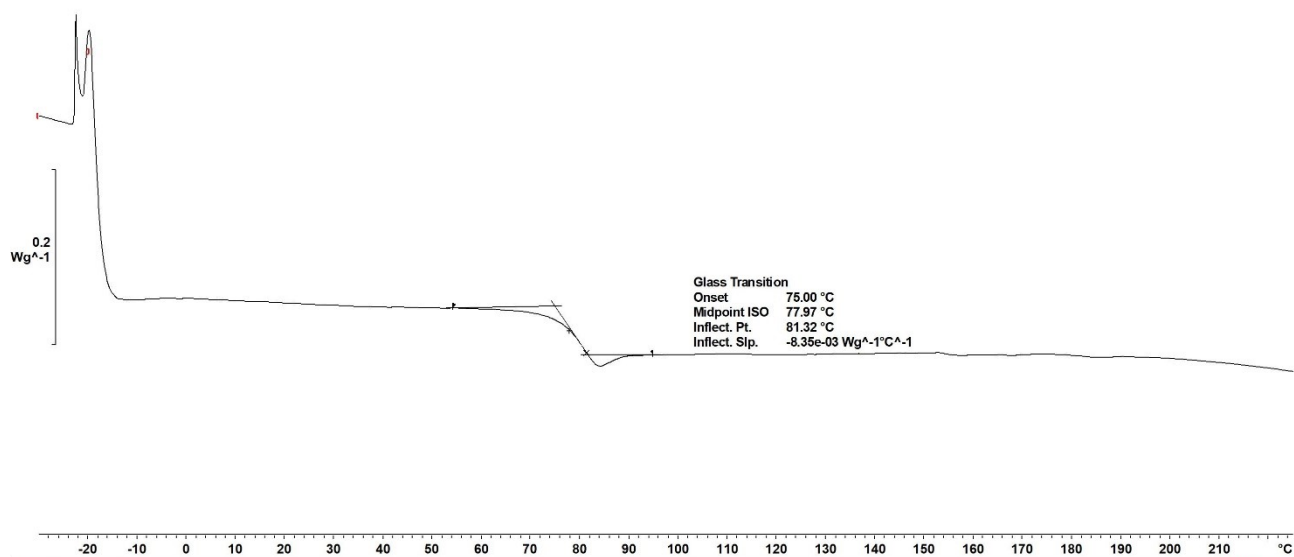

**Figure S8.** Glass transition temperature ( $T_g$ ) for the amorphous VINPO-PTOS salt, detected in the second heating run (heating/cooling/heating cycle).

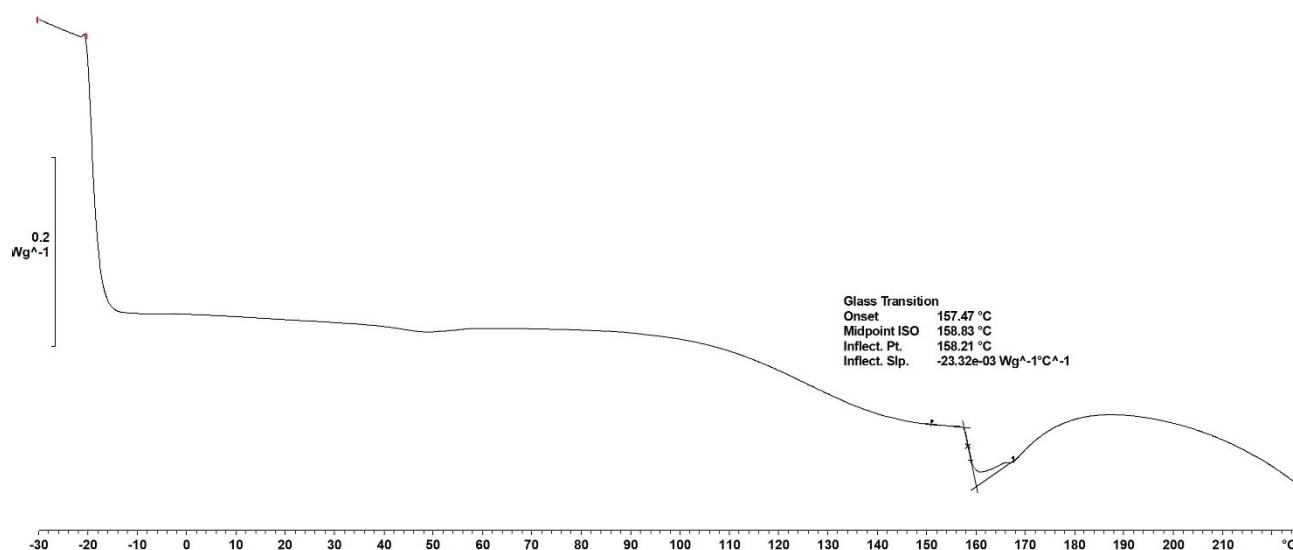

**Figure S9.** Glass transition temperature ( $T_g$ ) for PTOS MH, detected in the second heating run (heating/cooling/heating cycle).

## FT-IR

The spectra of the two salts are clearly distinguishable from those of the starting materials, which is a typical confirmation of the formation of a new solid phase. It is noteworthy that the spectra of the crystalline and amorphous samples are very similar, suggesting that both solid forms share essentially the same type of intermolecular interactions between the two cofomers. Even the characteristic signal broadening typical of amorphous solids is barely visible in the spectrum of this amorphous salt. The most notable differences between the two spectra are as follows: the out-of-plane (C–H) ring bending vibration appears at  $835\text{ cm}^{-1}$  in the crystalline salt and shifts to  $815\text{ cm}^{-1}$  in the amorphous form (evidenced through the light grey rectangle), similarly to pure PTOS MH. Furthermore, the amorphous salt exhibits characteristic water absorption bands in the  $3200 - 3550\text{ cm}^{-1}$  region, mainly due to O–H stretching vibrations. This observation aligns with TGA data, confirming the presence of residual moisture in the solid (light grey rectangle). Compared to the starting materials, the most significant spectral change is the shift of the C=O stretching vibration of VINPO, which moves from  $1716\text{ cm}^{-1}$  to  $1721\text{ cm}^{-1}$  in the crystalline salt and  $1723\text{ cm}^{-1}$  in the amorphous form (light orange rectangle). The assignment of the asymmetric ( $\nu_{\text{as}}$ ) and symmetric ( $\nu_{\text{s}}$ ) stretching bands of the O–SO<sub>3</sub><sup>–</sup> group proves particularly challenging. Comparison with the spectrum of the starting PTOS MH is not very informative, as the observed signals appear to fall between those reported in the literature for the free acid form of PTOS and its hydrated form, which exhibits three bands at  $1310\text{ cm}^{-1}$  ( $\nu_{\text{as}}$ ),  $1292\text{ cm}^{-1}$  ( $\nu_{\text{as}}$ ) and  $1171\text{ cm}^{-1}$  ( $\nu_{\text{s}}$ ). Further complicating the interpretation, the  $1300 - 980\text{ cm}^{-1}$  region in the salt spectra also contains overlapping signals attributable to VINPO. Given these considerations and based on literature data on the tosylate anion<sup>4</sup>, the band at  $1136\text{ cm}^{-1}$  in both salts can reasonably be assigned to the asymmetric stretching ( $\nu_{\text{as}}$ ) of the O–SO<sub>3</sub><sup>–</sup> group. Similarly, the bands at  $1119\text{ cm}^{-1}$  and  $1118\text{ cm}^{-1}$  can be assigned to the asymmetric stretching ( $\nu_{\text{as}}$ ) in the crystalline and amorphous salts, respectively (light grey rectangle). However, the identification of the symmetric stretching band of the O–SO<sub>3</sub><sup>–</sup> group remain unsolved in both salts. This spectral region is almost identical in the two salts, indicating similar molecular interactions and comparable short-range chemical environments in both solid forms.

1. L. Yu, *Adv Drug Deliv Rev*, 2001, **48**, 27–42.
2. A. Ali, R. Kharshoum and R. Sanad, *Int J Drug Deliv*, 2013, **5**, 167–176.
3. S. A. A. A. Hard, H. N. Shivakumar and M. A. M. Redhwan, *Int J Biol Macromol*, 2023, **253**, 127217.
4. L. Pejov, M. Ristova and B. Šoptrajanov, *Spectrochimica Acta Part A: Molecular and Biomolecular Spectroscopy*, 2011, **79**, 27–34.

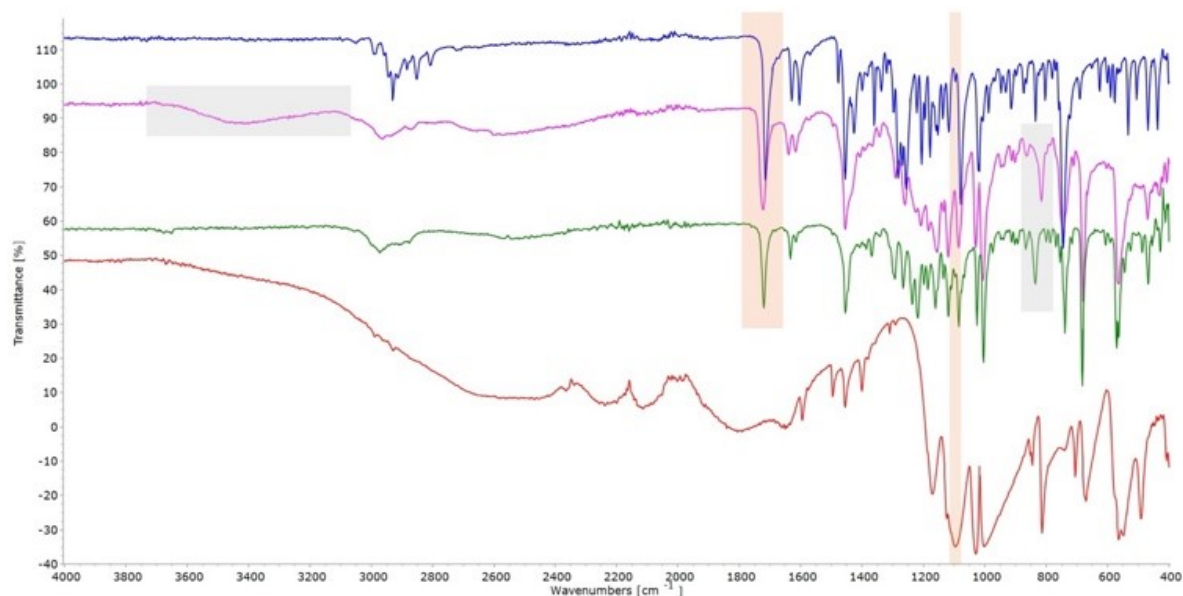

**Figure S10.** FT-IR ATR spectra of VINPO-PTOS crystalline (green) and amorphous (pink) salts, compared to VINPO (blue) and PTOS MH (red). Differences between the two salts spectra are highlighted through light grey rectangles; differences with the starting materials are highlighted through light orange rectangles.

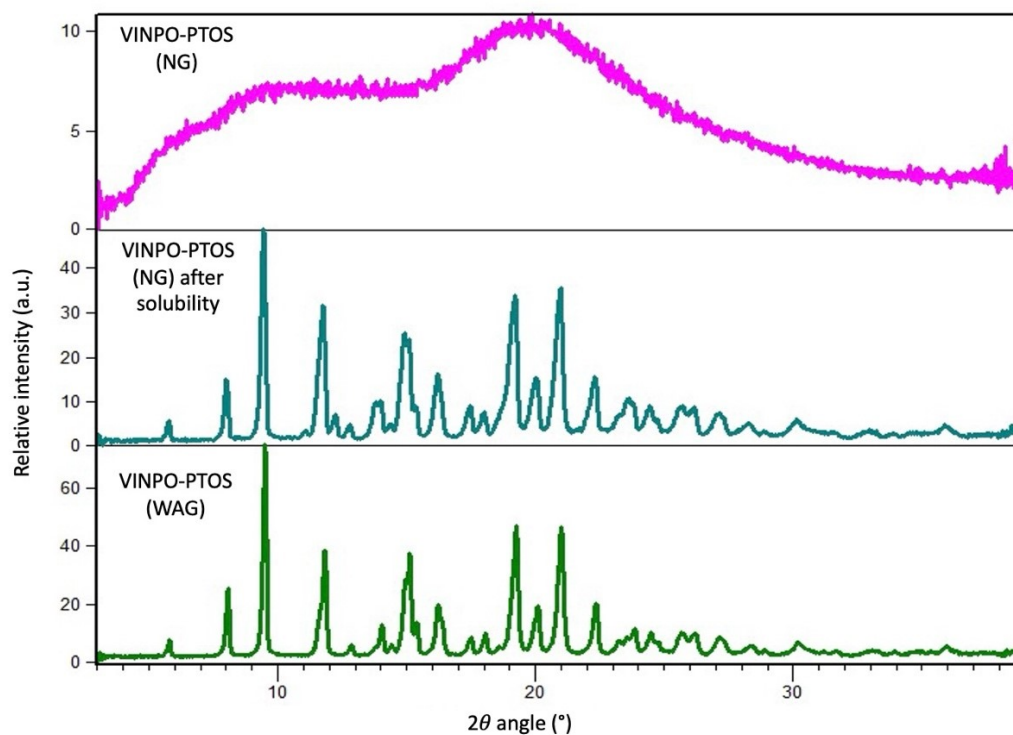

**Figure S11.** PXRD of the white solid collected after solubility studies of (initially) amorphous VINPO-PTOS salt

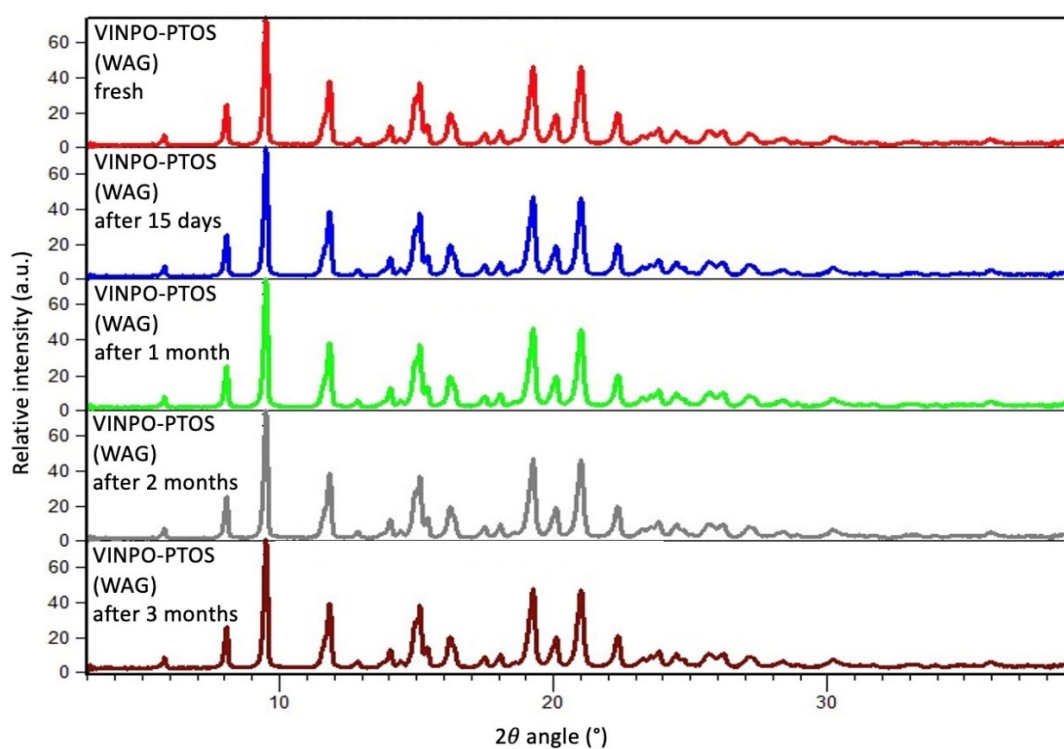

**Figure S12.** Physical stability of VINPO-PTOS crystalline salt over time.

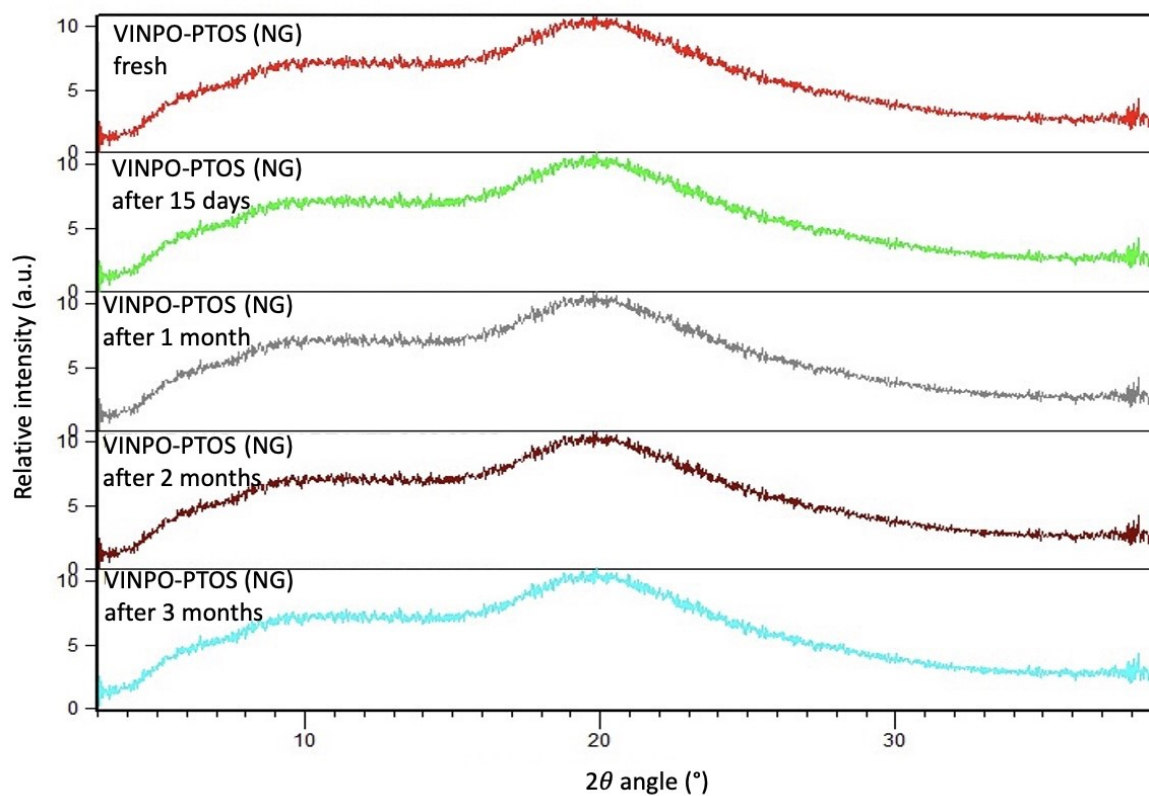

**Figure S13.** Physical stability of VINPO-PTOS amorphous salt over time.

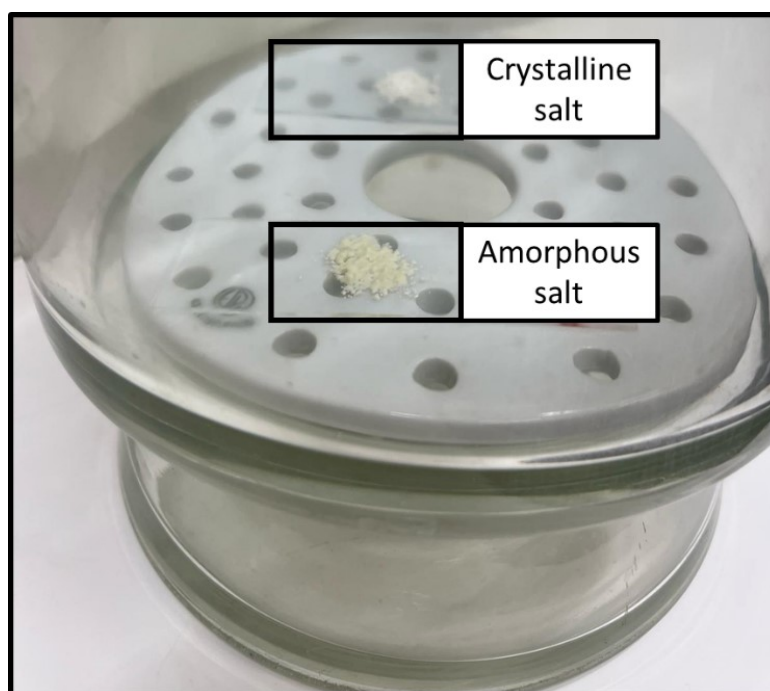

**Figure S14.** Appearance of VINPO-PTOS amorphous salt (yellow) and crystalline salt (white) after 2 hours of storage at 75% RH and 20 °C.

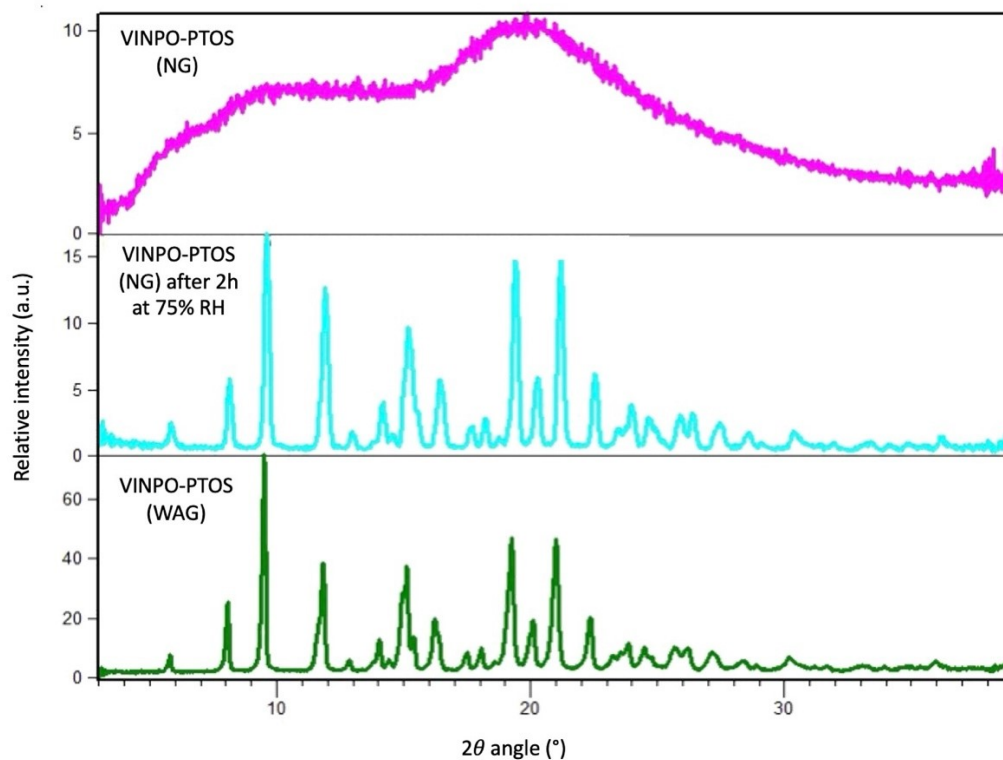

**Figure S15.** PXRD of VINPO-PTOS amorphous salt after 2h of exposure to 75% RH.
